# Supplementary material for: Temperature-Dependent Effects of Cutaneous Bacteria on a Frog’s Tolerance of Fungal Infection
Source: PubMed Central journal article supplement (PMC5845872; doi:10.3389/fmicb.2018.00410), 2018-03-07
Supplement: Image_1.pdf [file Image_1.pdf]

**Temperature dependent effects of cutaneous bacteria on a frog's tolerance of *Batrachochytrium dendrobatidis* infection**

Matthew J. Robak and Corinne L. Richards-Zawacki

Supplementary Figures

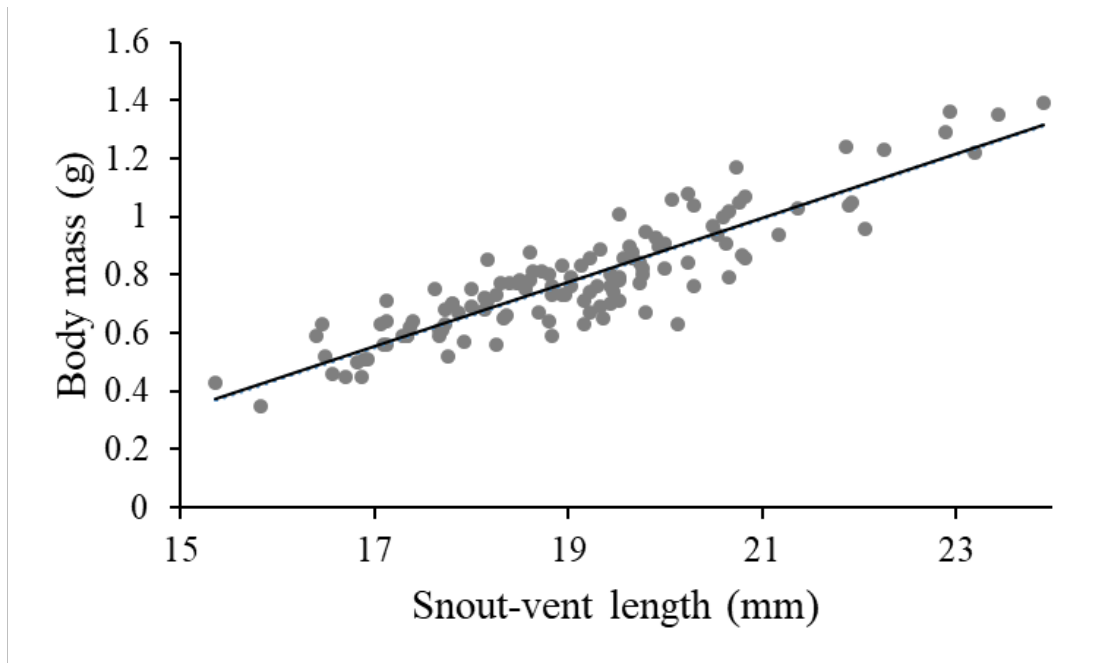

**Figure S1.** Relationship between snout-vent length (SVL, in mm) and body mass (g) for frogs on day -1 of the experiment. Line is the least-squares line of best fit ( $y = 0.1105x - 1.3251$ ;  $R^2 = 0.8504$ ). No outliers were present in the dataset.

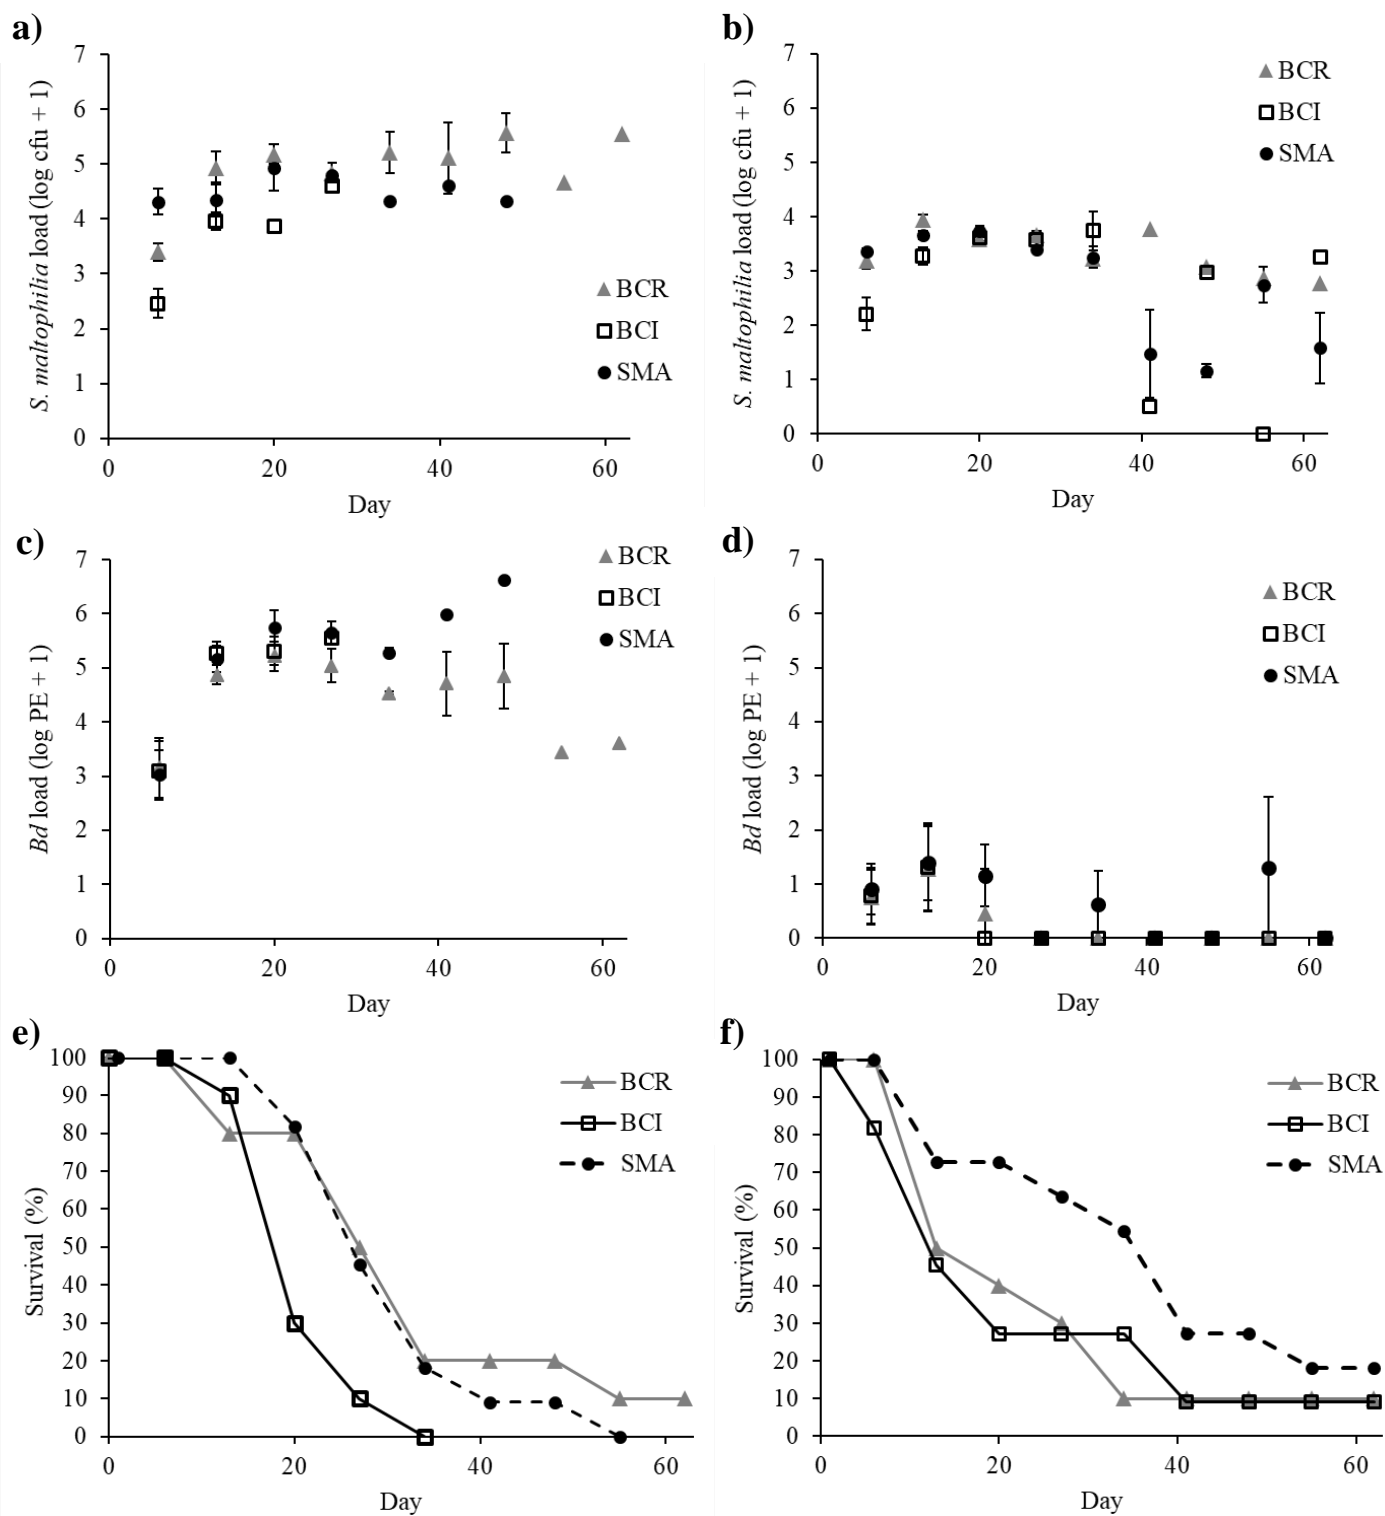

**Figure S2.** Weekly (a and b) *S. maltophilia* loads (measured in log<sub>10</sub> cfus) and (c and d) *Bd* loads (measured in log<sub>10</sub> PE) and (e and f) survival (%) for *Bd*-exposed frogs in each bacterial manipulation (BCR = bacterial community reduced, BCI = bacterial community intact, SMA = *S. maltophilia* added) at 14 °C (a, c and e) and 26 °C (b, d and f). Error bars are ± 1 SE of the mean.

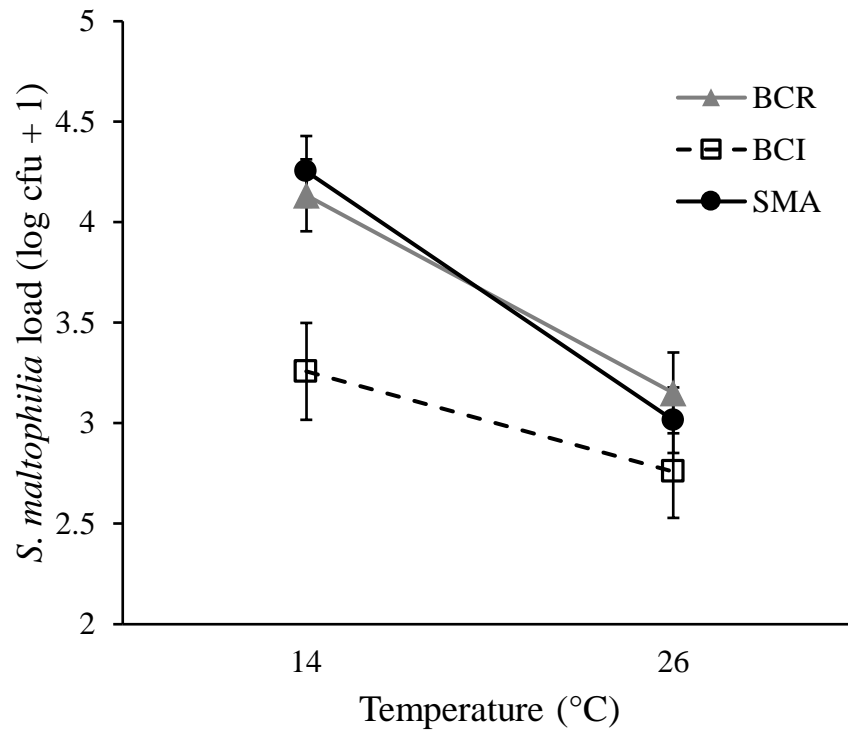

**Figure S3.** *S. maltophilia* load (mean log<sub>10</sub> ± SE of cfus) for *Bd*-exposed frogs by temperature and bacterial manipulation (BCR = bacterial community reduced, BCI = bacterial community intact, SMA = *S. maltophilia* added).

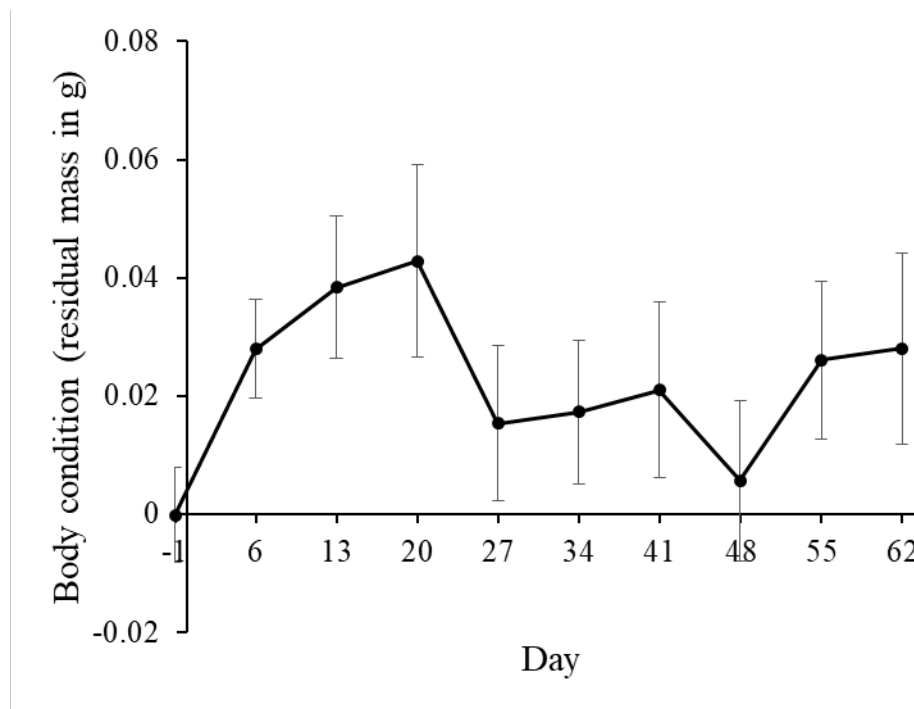

**Figure S4.** Body condition (mean ± SE), expressed as residual mass with respect to a regression of mass on snout-vent length at day -1, for frogs in all treatment groups over the course of the experiment. The only significant changes in body condition were between day -1 and days 6, 13, and 20.
